# Supplementary material for: The Epigenetic Role of miR-124 in HIV-1 Tat- and Cocaine-Mediated Microglial Activation
Source: MDPI journal article supplement (doi:10.3390/ijms232315017), 2022-11-30
Supplement: s1 [file s1]

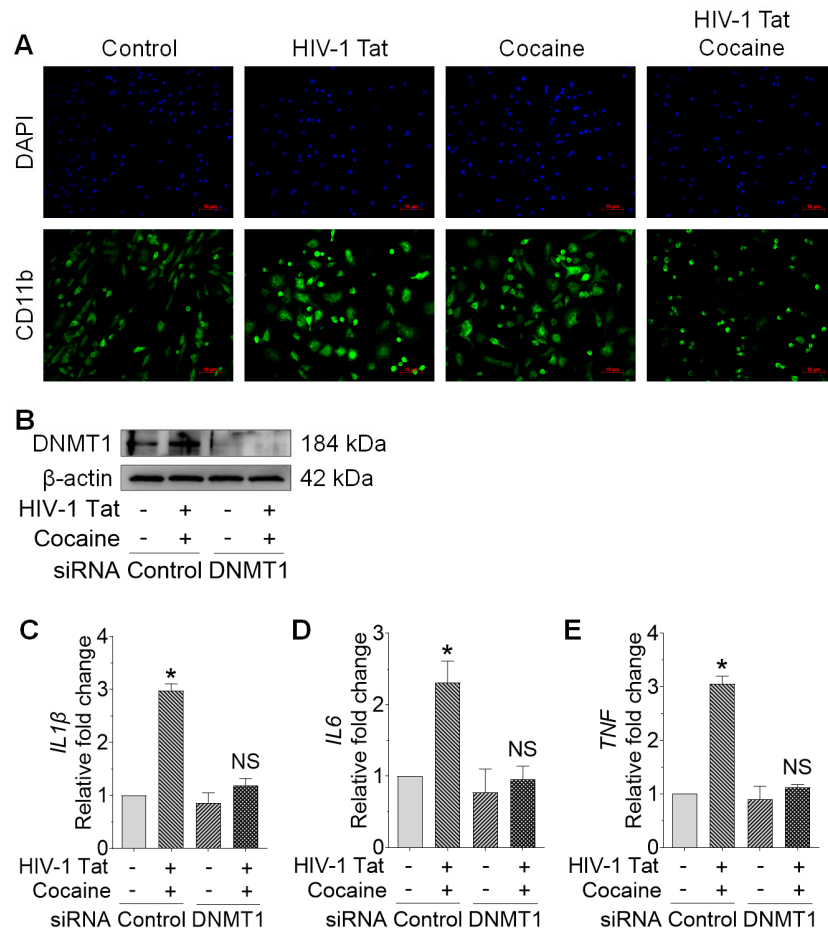

**Figure S1.** (A) Immunostaining showed the microglial morphology in HIV-1 Tat and/or cocaine-exposed mouse primary microglia. Scale bar: 10  $\mu$ M. (B) Representative western blot image showed the silencing efficiency of DNMT1 in mouse primary microglia transfected with scrambled and DNMT1 siRNA followed by HIV-1 Tat and cocaine exposure for 24 hours. Representative qPCR analysis showing the expression of *IL1 $\beta$*  (C), *IL6* (D), and *TNF* (E) mRNA in mouse primary microglia transfected with scrambled and DNMT1 siRNA followed by HIV-1 Tat and cocaine exposure for 24 hours. Data are mean  $\pm$  SEM from six independent experiments. Nonparametric Kruskal–Wallis one-way ANOVA followed by Dunn's post hoc test was used to determine the statistical significance of multiple groups. \* $p$  < 0.05 versus control; NS: Not significant.
